# Supplementary material for: Targeting Haemagglutinin Antigen of Avian Influenza Virus to Chicken Immune Cell Receptors Dec205 and CD11c Induces Differential Immune-Potentiating Responses
Source: MDPI journal article supplement (doi:10.3390/vaccines9070784), 2021-07-13
Supplement: s1 [file s1]

Supplementary Materials:

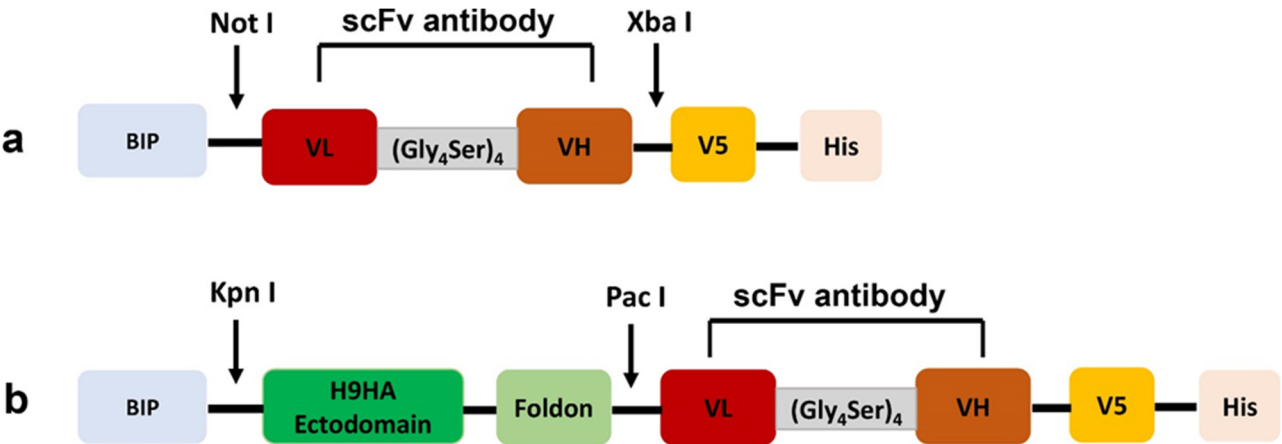

**Figure S1.** Schematic representation of single chain fragment variable antibody (scFv) and H9HA ectodomain fused scFv antibody expression cassettes (a) scFv construct. The expression cassette includes *Drosophila melanogaster* immunoglobulin heavy chain binding protein (BIP) secretion signal sequence followed by scFv antibody: variable light chain (vL), linker peptide (Gly<sub>4</sub>Ser)<sub>4</sub> and variable heavy chain (vH). The V5 tag is for detection and His tag for purification (b) H9HA Foldon-scFv construct. The expression cassette includes BIP secretion signal sequence followed by H9HA ectodomain fused with trimerisation signal (indicated as foldon), conjugated to scFv antibody: variable light chain (vL), linker peptide (Gly<sub>4</sub>Ser)<sub>4</sub> and variable heavy chain (vH).

**Table S1.** Sequences of probes and primers used for qRT-PCR.

| Gene         | Primer sequences (5'-3')       | Probe sequence (5'-3')                      |
|--------------|--------------------------------|---------------------------------------------|
| IFN $\gamma$ | F: GTGAAGAAGGTGAAAGA-TATCATGGA | FAM-TGGCCAA-GCTCCCGATGAACGA-TAMRA           |
|              | R: GCTTTGCGCTGGATTCTCA         |                                             |
| IL6          | F: AACATGCGTCAGCTCCTGAAT       | FAM- AGCAGCAC-CTCCCTCAAGGCACC-TAMRA         |
|              | R: TCTGCTAGGAACTTCTCCATT-GAA   |                                             |
| IL1 $\beta$  | F: GCTC-TACATGTCGTGTGTGATGAG   | FAM-CCACACTGCAGCTGGAG-GAAGCC-TAMRA          |
|              | R: TGTCGATGTCCCGCATGA          |                                             |
| IL4          | F: AACATGCGTCAGCTCCTGAAT       | FAM-AGCAGCACCTCCCTCAAGGCACC-TAMRA           |
|              | R: TCTGCTAGGAACTTCTCCATT-GAA   |                                             |
| RPLPO-1      | R: TGGCACCGCAGCTCATT           | FAM-CATCAC-TCAGAAATTTCAATGGTCCCTCGG G-TAMRA |
|              | F: TTGGGCATCACCACAAAGATT       |                                             |
|              | R: CCCACTTGTCTCCGGTCTTAA       |                                             |

IFN: Interferon IL: Interleukin RPLPO-1: Ribosomal phosphoprotein lateral stalk subunit PO F: Forward R: Reverse FAM: 6-carboxyfluorescein TAMRA: Tetramethylrhodamine.
